# Supplementary material for: Syncope Time Frames for Adverse Events after Emergency Department Presentation: An Individual Patient Data Meta-Analysis
Source: MDPI journal article supplement (doi:10.3390/medicina57111235), 2021-11-12
Supplement: s1 [file s1]

**Table S1.** Pooled rates of adverse outcomes at the different time frames.

|                                     | <b>N of<br/>studies</b> | <b>N of<br/>events</b> | <b>N of<br/>patients</b> | <b>Pooled rate<br/>(%)</b> | <b>95% CI<br/>(%)</b> | <b>I2 (%)</b> |
|-------------------------------------|-------------------------|------------------------|--------------------------|----------------------------|-----------------------|---------------|
| <b>Ventricular arrhythmias</b>      |                         |                        |                          |                            |                       |               |
| 24 hours                            | 8                       | 29                     | 11653                    | 0.3                        | 0.2-0.5               | 30            |
| 72 hours                            | 7                       | 33                     | 10553                    | 0.4                        | 0.2-0.8               | 50            |
| 7-10 days                           | 8                       | 40                     | 11284                    | 0.5                        | 0.3-0.7               | 47            |
| 1 month                             | 8                       | 47                     | 11175                    | 0.5                        | 0.3-0.8               | 35            |
| 1 year                              | 5                       | 21                     | 2917                     | 0.9                        | 0.6-1.4               | 15            |
| <b>Supraventricular arrhythmias</b> |                         |                        |                          |                            |                       |               |
| 24 hours                            | 8                       | 87                     | 11653                    | 0.8                        | 0.5-1.2               | 48            |
| 72 hours                            | 7                       | 91                     | 10553                    | 0.9                        | 0.7-1.2               | 24            |
| 7-10 days                           | 8                       | 94                     | 11284                    | 0.9                        | 0.6-1.3               | 45            |
| 1 month                             | 8                       | 111                    | 11175                    | 1.1                        | 0.8-1.5               | 31            |
| 1 year                              | 5                       | 62                     | 2917                     | 1.3                        | 0.3-5.0               | 94            |
| <b>Pause &gt;3 seconds</b>          |                         |                        |                          |                            |                       |               |
| 24 hours                            | 6                       | 51                     | 10593                    | 0.4                        | 0.2-0.7               | 48            |
| 72 hours                            | 5                       | 54                     | 9493                     | 0.5                        | 0.2-1.0               | 52            |
| 7-10 days                           | 6                       | 57                     | 10225                    | 0.4                        | 0.2-0.9               | 60            |
| 1 month                             | 6                       | 65                     | 10116                    | 0.5                        | 0.2-0.9               | 64            |
| 1 year                              | 3                       | 17                     | 1879                     | 0.7                        | 0.1-3.7               | 86            |
| <b>Sick sinus syndrome</b>          |                         |                        |                          |                            |                       |               |
| 24 hours                            | 8                       | 67                     | 11653                    | 0.7                        | 0.3-1.7               | 90            |
| 72 hours                            | 7                       | 70                     | 10553                    | 0.9                        | 0.4-2.2               | 91            |
| 7-10 days                           | 8                       | 78                     | 11284                    | 0.9                        | 0.4-2.0               | 90            |
| 1 month                             | 8                       | 85                     | 11175                    | 1.0                        | 0.5-2.2               | 90            |

|                                             |   |     |       |     |         |    |
|---------------------------------------------|---|-----|-------|-----|---------|----|
| 1 year                                      | 5 | 42  | 2917  | 1.4 | 0.5-3.6 | 88 |
| <b>High grade AV block</b>                  |   |     |       |     |         |    |
| 24 hours                                    | 8 | 66  | 11653 | 0.5 | 0.2-1.2 | 87 |
| 72 hours                                    | 7 | 76  | 10553 | 0.8 | 0.4-1.8 | 87 |
| 7-10 days                                   | 8 | 82  | 11284 | 0.7 | 0.3-1.6 | 88 |
| 1 month                                     | 8 | 91  | 11175 | 0.9 | 0.5-1.8 | 86 |
| 1 year                                      | 5 | 29  | 2917  | 0.8 | 0.2-2.6 | 86 |
| <b>PM or ICD malfunction</b>                |   |     |       |     |         |    |
| 24 hours                                    | 8 | 2   | 11653 | 0.1 | 0.0-0.1 | 0  |
| 72 hours                                    | 7 | 3   | 10553 | 0.1 | 0.0-0.2 | 0  |
| 7-10 days                                   | 8 | 3   | 11284 | 0.1 | 0.0-0.2 | 0  |
| 1 month                                     | 8 | 4   | 11175 | 0.1 | 0.0-0.2 | 0  |
| 1 year                                      | 5 | 4   | 2917  | 0.3 | 0.1-0.7 | 3  |
| <b>Ischemic or structural heart disease</b> |   |     |       |     |         |    |
| 24 hours                                    | 8 | 74  | 11653 | 0.8 | 0.4-1.6 | 83 |
| 72 hours                                    | 7 | 75  | 10553 | 0.9 | 0.4-1.9 | 87 |
| 7-10 days                                   | 8 | 105 | 11284 | 1.2 | 0.8-2.0 | 82 |
| 1 month                                     | 8 | 114 | 11175 | 1.3 | 0.8-2.2 | 83 |
| 1 year                                      | 5 | 73  | 2917  | 2.6 | 1.7-4.0 | 68 |
| <b>Pulmonary embolism</b>                   |   |     |       |     |         |    |
| 24 hours                                    | 8 | 25  | 11653 | 0.3 | 0.2-0.4 | 0  |
| 72 hours                                    | 7 | 27  | 10553 | 0.3 | 0.2-0.4 | 0  |
| 7-10 days                                   | 8 | 34  | 11284 | 0.3 | 0.2-0.5 | 0  |
| 1 month                                     | 8 | 37  | 11175 | 0.4 | 0.2-0.6 | 18 |
| 1 year                                      | 5 | 14  | 2917  | 0.5 | 0.3-0.9 | 0  |

**Aortic dissection**

|           |   |   |       |     |         |   |
|-----------|---|---|-------|-----|---------|---|
| 24 hours  | 7 | 4 | 11282 | 0.1 | 0.0-0.0 | 0 |
| 72 hours  | 6 | 4 | 10182 | 0.1 | 0.0-0.1 | 0 |
| 7-10 days | 7 | 4 | 10913 | 0.1 | 0.0-0.2 | 0 |
| 1 month   | 7 | 4 | 10804 | 0.1 | 0.0-0.2 | 0 |
| 1 year    | 4 | 2 | 2546  | 0.1 | 0.0-0.2 | 0 |

**Haemorrhage**

|           |   |     |       |     |         |    |
|-----------|---|-----|-------|-----|---------|----|
| 24 hours  | 8 | 131 | 11653 | 1.3 | 0.8-2.2 | 83 |
| 72 hours  | 6 | 130 | 10182 | 1.5 | 0.9-2.8 | 86 |
| 7-10 days | 7 | 149 | 10913 | 1.5 | 0.9-2.5 | 86 |
| 1 month   | 7 | 158 | 10804 | 1.6 | 1.0-2.6 | 86 |
| 1 year    | 5 | 51  | 2917  | 1.8 | 0.9-3.8 | 84 |

**Traumatic syncope recurrence**

|           |   |    |      |     |          |    |
|-----------|---|----|------|-----|----------|----|
| 24 hours  | 5 | 0  | 9493 | 0.1 | 0.0-0.2  | 0  |
| 72 hours  | 5 | 2  | 9493 | 0.1 | 0.0-0.3  | 20 |
| 7-10 days | 6 | 16 | 9813 | 0.2 | 0.1-0.8  | 75 |
| 1 month   | 6 | 24 | 9737 | 0.4 | 0.1-1.3  | 83 |
| 1 year    | 3 | 58 | 1350 | 0.9 | 0.0-15.6 | 90 |

**Cardiopulmonary resuscitation**

|           |   |    |      |     |         |    |
|-----------|---|----|------|-----|---------|----|
| 24 hours  | 4 | 0  | 3827 | 0.1 | 0.0-0.3 | 0  |
| 72 hours  | 3 | 3  | 2727 | 0.1 | 0.1-0.4 | 0  |
| 7-10 days | 5 | 10 | 4515 | 0.3 | 0.1-0.6 | 38 |
| 1 month   | 5 | 11 | 4406 | 0.3 | 0.1-0.7 | 53 |
| 1 year    | 3 | 9  | 2234 | 0.4 | 0.1-1.3 | 58 |

*N: number; CI: confidence interval; PM: pacemaker; ICD: implantable cardioverter defibrillator; AV: atrioventricular.*
